# Supplementary material
Source: PubMed Central journal article supplement (PMC2807290)
Supplement: supp_M109.045302_jbc.M109.045302-1.pdf [file supp_M109.045302_jbc.M109.045302-1.pdf]

Supplementary Fig. 1. Alignment of predicted fungal PNGase homologs and illustration of residues critical for activity. Amino acids corresponding to the CXXC motifs and the catalytic triad are indicated. *Aoryzae* = *Aspergillus oryzae*; *Aniger* = *Aspergillus niger*; *Pchrysogenum* = *Penicillium chrysogenum*; *Nfischeri* = *Neosartorya fischeri*; *Anidulans* = *Aspergillus nidulans*; *Pmarneffei* = *Penicillium marneffei*; *Mfijiensi* = *Mycosphaerella fijiensis*; *Mgraminicola* = *Mycosphaerella graminicola*; *Foxysporum* = *Fusarium oxysporum*; *Fverticillioides* = *Fusarium verticillioides*; *Tvirens* = *Trichoderma virens*; *Treesei* = *Trichoderma reesei*; *Ntetrasperma* = *Neurospora tetrasperma*; *Ndiscreta* = *Neurospora discreta*.

**Supplementary Table 1.** List of primers used for the generation of Png1 mutants; amino acids mutated are indicated in the left column.

| ScPng1       | Forward primer                                  | Reverse primer                                    |
|--------------|-------------------------------------------------|---------------------------------------------------|
| N178T        | GATTCCTCGTTATaccGATCCAATTAAG                    | CTTAATTGGATCggtATAACGAGGAAATC                     |
| D179E, P180A | CCTCGTTATAACgaggcaATTAAGTTGCTG<br>G             | CCAGCAACTTAATtgctcGTTATAACGAGG                    |
| I181W        | TTATAACGATCCAtggAAGTTGCTGGAA<br>AC              | GTTTCCAGCAACTTccaTGGATCGTTATAA<br>C               |
| K182Q        | AACGATCCAATTcagTTGCTGGAAACTA<br>G               | GTTTCCAGCAActgAATTGGATCGTTATAA<br>C               |
| I181W, K182Q | TTATAACGATCCAtggcagTTGCTGGAAAC<br>TAG           | CTAGTTTCCAGCAActgccaTGGATCGTTAT<br>AAC            |
| E185R        | CCAATTAAGTTGCTGcgGACTAGAAAGG<br>GAAGATGCG       | GCATCTTCCCTTTCTAGTCcgCAGCAACTT<br>AATTGGATCG      |
| E185R, T186V | CAATTAAGTTGCTGcgagttAGAAAGGGA<br>AGATGCG        | CATCTTCCCTTTCTaactcgCAGCAACTTAA<br>TTGG           |
| R187K, K188R | GTTGCTGGAAACTaaaaggGGAAGATGCG<br>GTG            | CACCGCATCTTCCccttttAGTTTCCAGCAAC                  |
| E193D        | GGAAGATGCGGTgacTGGTGAATTTAT<br>TTAC             | AAATAAATTGCACCAgtcACCGCATCTTC<br>CC               |
| E193D, W194F | GGAAGATGCGGTgacttcTGCAATTTATTT<br>AC            | AAATAAATTGCAgaagtcACCGCATCTTCC<br>C               |
| W194F, C195A | AAGGGAAGATGCGGTGAAttgccAATTTA<br>TTACTTTGATTTTG | AAGTAAATAAATTggcaaaTTCACCGCATC<br>TTCCCTTC        |
| L198V        | GAATGGTGCAATgtaTTTACTTTGATTTT<br>G              | AATCAAAGTAAAtacATTGCACCATTAC                      |
| L200M        | GAATGGTGCAATTTATTTatgTTGATTTT<br>GAAGTCGTTT     | CGACTTCAAATCAAcatAAATAAATTGC<br>ACCATTACCG        |
| L200M, I201L | GCAATTTATTTACTatgcttTTGAAGTCGTT<br>TGGG         | CAAACGACTTCAAaagcatAGTAAATAAAT<br>TGCACC          |
| G206D, L207I | TTTTGAAGTCGTTTgacataGATGTTGCT<br>ACG            | GTAGCGAACATCtatgtaAAACGACTTCAA<br>ATC             |
| D208R, V209A | TCGTTTGGGTTAcgtgctCGCTACGTCTGG                  | CCAGACGTAGCGgagcagTAACCCAAACGA<br>CTTC            |
| Y211W        | GGGTTAGATGTTTCGCTggGTCTGGAATAG<br>AGAAG         | CTCTATTCCAGACccaGCGAACATCTAAC<br>CCAAAC           |
| N214C, R215Q | CGCTACGTCTGGtgtaaaGAAGATCATGTT<br>TGG           | AAACATGATCTTctgacaCCAGACGTAGCG<br>AAC             |
| V219L        | TAGAGAAGATCATcttTGGTGTGAATATT<br>TTTC           | AATATTCACACCAaagATGATCTTCTCTAT<br>TC              |
| C221T        | ATAGAGAAGATCATGTTTGaccGAATA<br>TTTTTCAAATTTT    | ATTTGA<br>AAAATATTCggtCCAAACATGATCTTCTCT<br>ATTCC |
| Y223I        | GTTTGGTGTGAAattTTTTCAAATTTTTTG                  | CAAAAAATTTGAAAAaafTTCACACCAAA<br>CATG             |
| F224Y        | TTGGTGTGAAAtacTTTTCAAATTTTTTGA<br>ATAGGTG       | AAATTTGAAAAgtaTTCACACCAAAACATG<br>ATCTTC          |
| N226E, F227H | GAATATTTTTCAgagcatTTGAATAGGTGG<br>G             | CCACCTATTCAAatgctcTGAAAAATATTCA<br>C              |
| NcPNG1       | Forward primer                                  | Reverse primer                                    |
| A208C        | ACGAGTAAAGCGTGGAAGGtgTGGCGAC<br>TTTGCC          | TGGCAAAGTCGCCacaCCTTCCACGCTTT<br>ACTCG            |
| Y235H        | TGGGTGTGGTGCCAGGAAGACcACCTGT<br>GGACCG          | GTAAATTTTCGGTCCACAGGTgGTCTTCT<br>GGCACCACAC       |
